# Supplementary material for: Quantitative trait loci mapping and candidate gene analysis of stoma-related traits in wheat ( Triticum aestivum L.) glumes
Source: PeerJ journal article supplement (doi:10.7717/peerj.13262), 2022-04-08

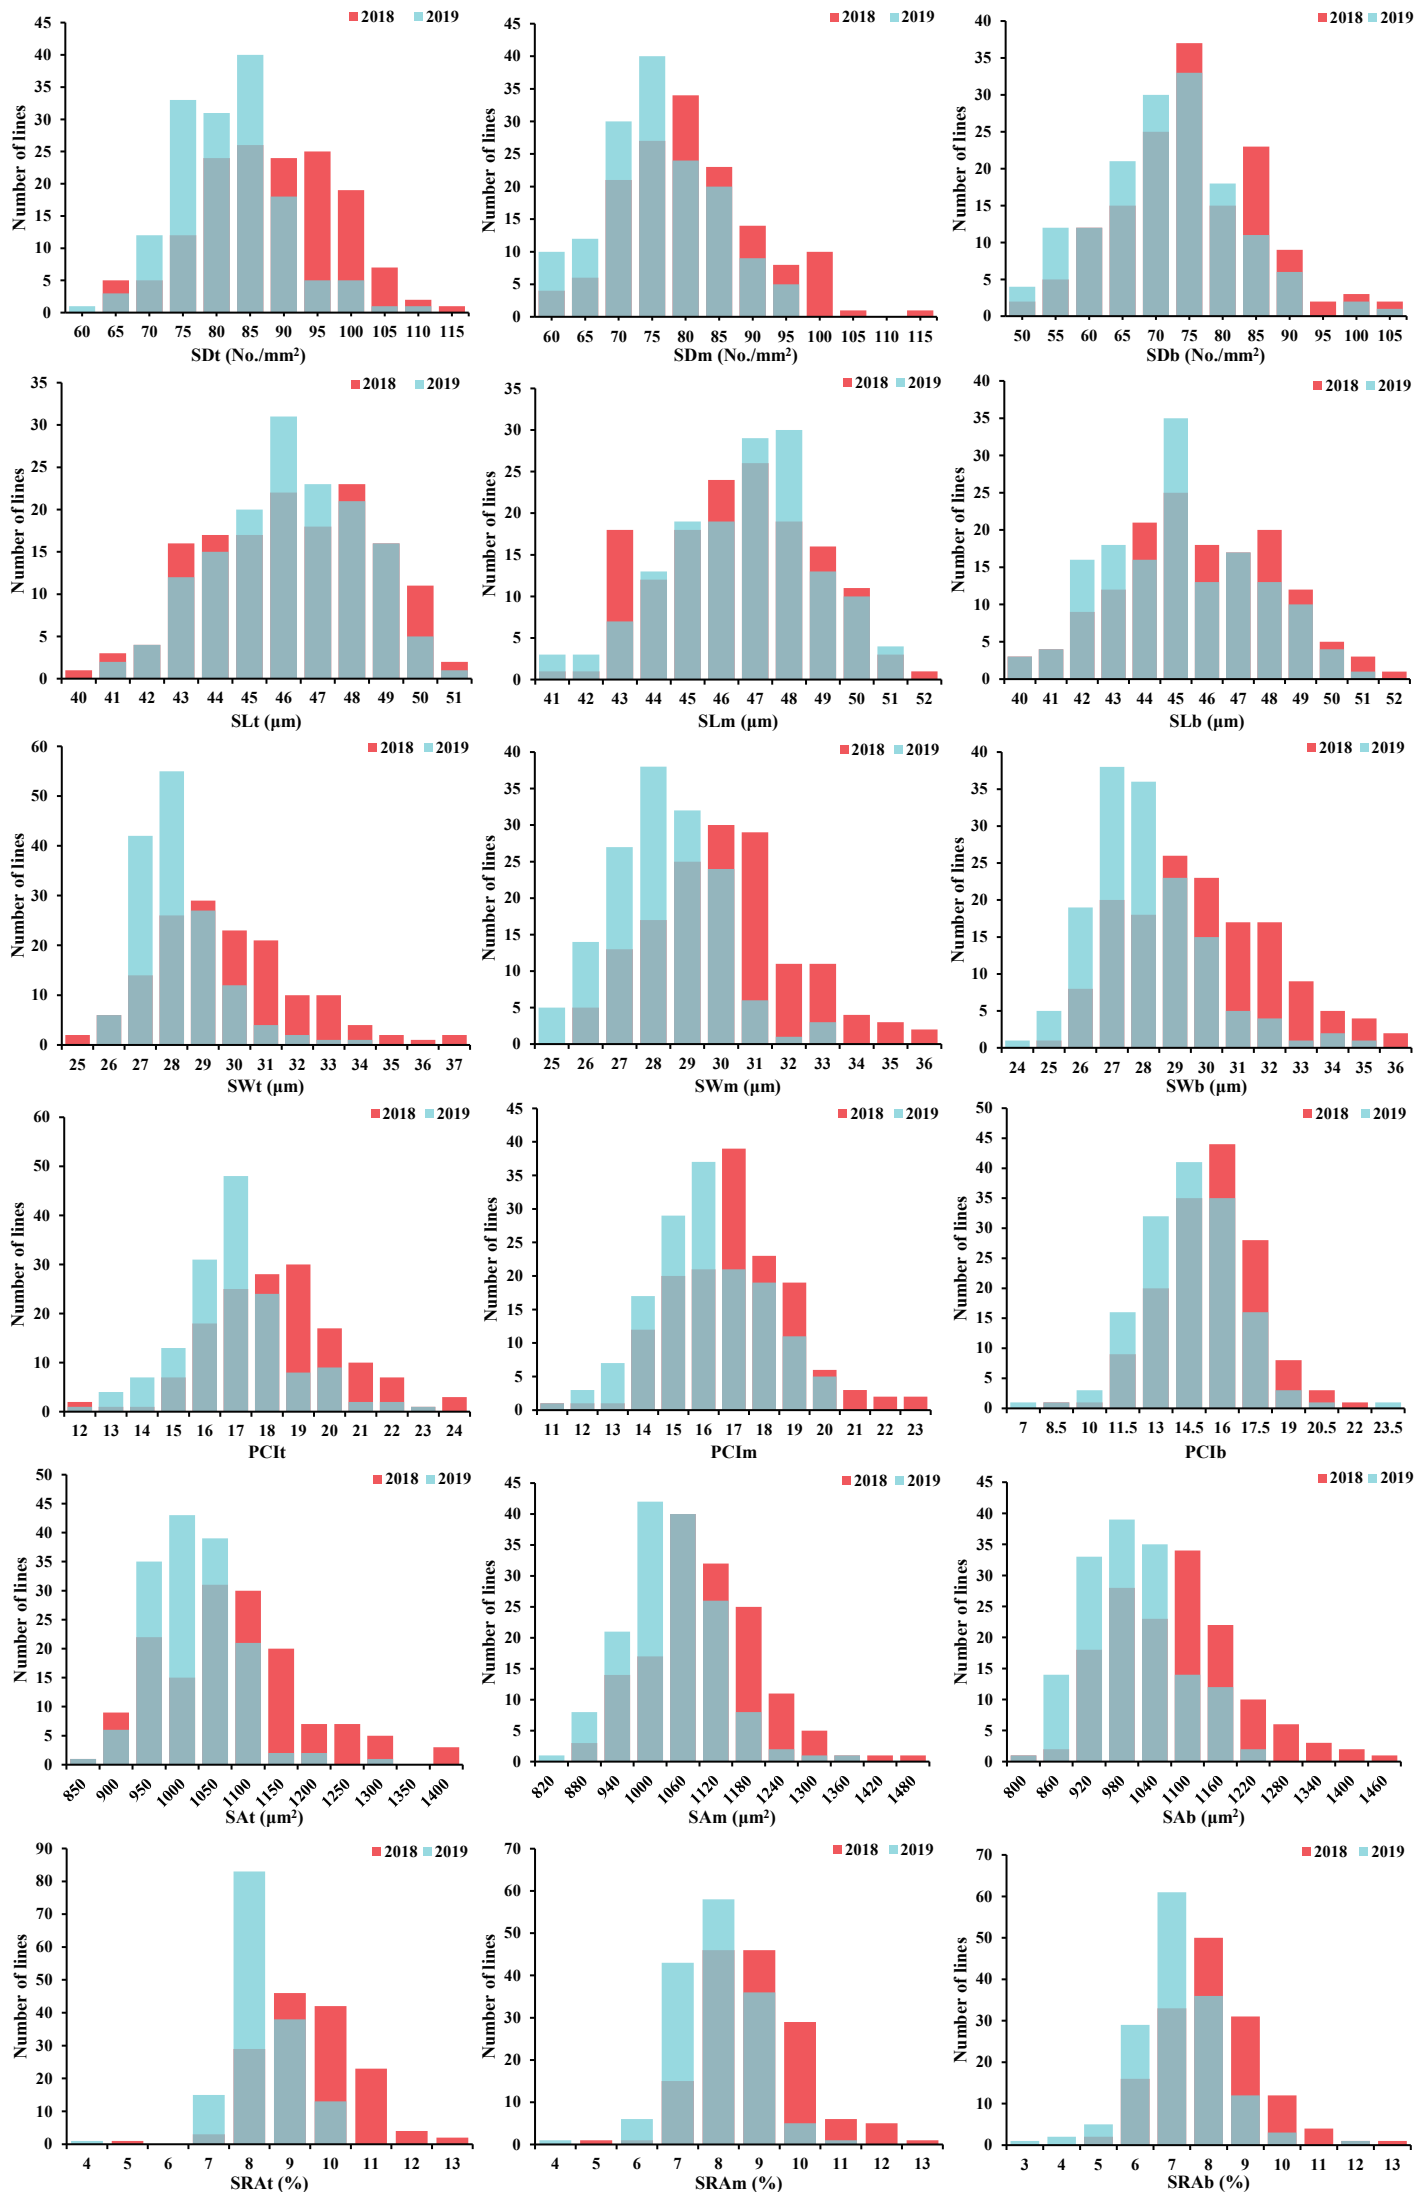

Supplement: Figure_S1.pdf [file Figure_S1.pdf]
