# Supplementary material for: Quantitative trait loci mapping and candidate gene analysis of stoma-related traits in wheat (Triticum aestivum L.) glumes
Source: PeerJ. 2022 Apr 8;10:e13262. doi: 10.7717/peerj.13262 (PMC8997193; doi:10.7717/peerj.13262)
Supplement: Supplemental Information 4 [file peerj-10-13262-s004.xlsx]

## Sheet: 2018
No. of lines	SDt	SDm	SDb	SLt	SLm	SLb	SWt	SWm	SWb	PCIt	PCIm	PCIb	SAt	SAm	SAb	SRAt	SRAm	SRAb
1	98.5236	94.744	78.3488	46.5104	43.4201	42.0486	32.5087	30.5729	30.2778	18.5747	17.9368	16.341	1187.52	1042.6	999.921	11.6998	9.87801	7.83426
2	86.2054	80.5687	78.1311	47.9167	44.4444	45.5952	34.7619	32.2396	30.0397	17.0152	16.7496	15.4617	1308.22	1125.37	1075.73	11.2775	9.06699	8.40483
3	86.0748	88.1424	88.1424	46.1257	46.9907	46.1257	38.1067	33.8542	30.2778	18.753	16.1366	16.7064	1380.49	1249.44	1096.87	11.8826	11.0128	9.66812
4	95.3243	95.3243	95.3243	47.5	47.5	47.5	32.5298	32.5298	32.5298	21.5076	21.5076	21.5076	1213.57	1213.57	1213.57	11.5683	11.5683	11.5683
5	95.542	95.5202	95.5202	43.5119	45.9945	43.9583	32.2917	31.0938	29.0476	18.4619	18.4577	18.4577	1103.54	1123.23	1002.86	10.5434	10.7291	10.6438
6	98.7521	72.4182	63.7672	45.8565	50	48.3333	31.2269	32.1065	34.0278	20.7658	18.1046	14.8967	1124.08	1260.18	1291.07	11.1006	9.12599	8.2328
7	86.2054	79.8931	72.3294	47.3148	48.2812	46.6319	37.6389	38.5417	31.5972	19.2987	18.6237	15.7283	1397.99	1460.76	1156.65	12.0514	11.6705	8.36598
8	86.2054	79.8931	72.3294	45.9945	45.961	45.1997	29.3558	29.7719	29.4175	18.2367	16.8767	14.777	1059.91	1074.15	1043.78	9.13702	8.58173	7.54963
9	90.6815	90.1736	88.9404	47.3611	43.1061	39.125	31.9444	30.3409	26.0278	20.3405	16.7555	13.6147	1187.65	1026.68	799.394	10.7697	9.25798	7.10984
10	91.3344	78.1311	82.375	43.5119	47.6736	45.1997	32.0833	30.6019	29.4175	17.2922	17.7574	16.8293	1095.87	1145.24	1043.78	10.009	8.94787	8.59817
11	94.744	77.3622	82.2662	49.7222	47.7701	40.4167	31.0417	29.8997	29.6875	23.4235	17.6539	13.4382	1211.62	1121.22	941.898	11.4793	8.67403	7.74864
12	102.796	93.2568	93.3112	43.4861	42.0486	41.7593	28.9722	28.0324	28.7963	19.4392	16.4886	16.2719	989.013	925.298	943.972	10.1667	8.62904	8.80832
13	95.0342	98.6977	65.5083	45.2381	45	41.1979	28.3036	25.8333	27.3958	19.4486	19.9863	11.1185	1005.11	912.562	885.991	9.55201	9.00678	5.80398
14	100.076	71.7472	66.9229	41.9907	46.25	48.9352	28.5995	30.2778	28.6111	17.6456	15.3472	16.0257	942.719	1099.27	1099.07	9.43436	7.88697	7.3553
15	78.8566	62.6427	61.482	45.506	48.7731	46.875	32.7976	30.4861	28.6458	16.3296	14.9016	13.5092	1171.6	1167.22	1054.08	9.23886	7.31178	6.48068
16	101.055	65.6171	68.9905	43.9583	46.5104	45	27.0023	31.0938	28.75	19.5273	14.1944	13.9706	931.777	1135.25	1015.59	9.41611	7.44921	7.00663
17	93.946	83.2818	82.8103	50	45.5972	45.9375	29.0179	28.6111	30.9375	23.4865	17.3152	17.4751	1138.95	1024.1	1115.64	10.7	8.5289	9.23861
18	97.138	78.3488	65.4539	42.6786	46.5104	44.375	28.125	27.4479	27.7315	17.6933	16.9486	12.8888	942.263	1002.14	966.009	9.15295	7.85166	6.3229
19	77.5508	75.846	59.7409	45.8333	43.254	43.3333	28.4921	30.2778	26.6667	16.291	14.1901	11.218	1025.12	1028.06	907.111	7.94989	7.79744	5.41917
20	90.8991	85.7484	59.7409	42.25	45.7361	42.2222	30.0833	28.0278	27.9514	16.2261	17.9368	10.6501	997.751	1006.28	926.433	9.06947	8.62866	5.5346
21	86.8366	72.9079	74.4313	45.4167	46.9907	45.3646	27.6042	30.3009	28.8021	17.9115	16.099	15.3176	984.146	1117.73	1025.68	8.54599	8.14915	7.63425
22	84.8053	82.7015	70.8404	42.8571	42.2917	44.5312	29.2262	30.5729	26.7188	15.5765	14.7919	14.0479	983.253	1014.99	934.008	8.3385	8.39411	6.61655
23	89.4482	85.5307	86.0748	45.5093	46.3021	43.5714	25.5556	30.0521	29.0476	18.5255	18.3368	16.341	912.966	1092.31	993.532	8.16632	9.34258	8.55181
24	66.5965	68.2287	62.0261	42.0833	47.6042	47.9167	28.0208	26.0938	27.0833	11.7943	15.4617	14.2412	925.68	975.104	1018.73	6.1647	6.65301	6.31878
25	109.144	78.9291	69.0993	44.4444	46.0069	43.75	30.0397	29.6759	30.4688	21.5593	16.7064	13.226	1048.05	1071.76	1046.41	11.4389	8.45931	7.23062
26	78.1311	75.3019	71.2756	46.6667	48.6458	44.375	29.8438	30.7292	31.0938	17.0152	17.8196	14.0352	1093.28	1173.45	1083.13	8.54189	8.83633	7.72009
27	98.0085	77.6959	67.9023	46.2121	45.5729	44.7396	28.7879	28.0729	25.1562	20.9303	16.1366	13.5915	1044.32	1004.3	883.502	10.2353	7.80301	5.99918
28	75.3019	69.4801	67.3582	45.6597	50.9491	46.9792	32.2396	29.3519	33.8542	15.699	18.0357	14.8662	1155.56	1173.93	1248.5	8.70158	8.15647	8.40964
29	86.2054	79.8931	72.3294	45.9945	45.961	45.1997	29.3558	29.7719	29.4175	18.2367	16.8767	14.777	1059.91	1074.15	1043.78	9.13702	8.58173	7.54963
30	74.2137	67.467	53.8648	44.2708	48.3333	43.9062	28.4896	29.6354	27.8646	14.5452	15.761	10.3838	990.087	1124.42	960.392	7.3478	7.58611	5.17313
31	71.4933	70.7315	67.5758	46.131	48.0208	47.3438	30.3968	31.6146	34.2188	15.2142	16.3107	15.1467	1100.75	1191.75	1271.73	7.86965	8.42946	8.59385
32	87.2718	77.6959	69.0993	48.6458	49.6354	43.2292	29.2708	30.3646	28.3333	20.6522	19.1417	12.913	1117.76	1183.12	961.489	9.75494	9.19235	6.64382
33	74.4313	73.3432	55.4971	50.625	47.0833	46.6667	28.9583	27.9167	26.875	19.0759	16.259	12.086	1150.82	1031.81	984.521	8.56572	7.56763	5.4638
34	90.3187	81.8309	75.3563	44.9306	47.2454	47.3843	30.1389	30.6713	28.7037	18.2331	18.2657	16.9195	1063.01	1137.53	1067.68	9.601	9.30848	8.04565
35	82.1574	96.0861	70.5139	48.4375	45.787	46.25	28.7847	32.1296	29.7917	19.2757	20.144	15.0834	1094.49	1154.83	1081.62	8.99208	11.0963	7.62695
36	92.4951	77.2606	83.2456	42.6042	42.338	44.1667	26.1458	28.3333	28.3333	16.7889	13.849	16.2387	874.428	941.667	982.34	8.08803	7.27537	8.17755
37	87.9247	72.255	66.27	46.875	49.1667	49.1667	27.2222	30.8333	30	19.3194	17.4666	16.0199	1001.69	1190.04	1157.88	8.80736	8.59862	7.67324
38	86.2054	79.8931	72.3294	45.9945	45.961	45.1997	29.3558	29.7719	29.4175	18.2367	16.8767	14.777	1059.91	1074.15	1043.78	9.13702	8.58173	7.54963
39	74.9754	88.6321	71.9829	47.1354	48.3333	48.7731	27.5521	29.1667	28.287	16.6576	20.7054	17.1234	1019.46	1106.63	1083.02	7.64347	9.80831	7.79592
40	85.3131	80.0899	73.7784	42.7083	43.6806	44.375	27.1875	27.8819	31.6898	15.5611	15.2811	14.528	911.489	956.051	1103.89	7.7762	7.657	8.14436
41	73.2343	72.0373	69.6434	43.8194	45.3935	42.4537	28.7153	30.4861	29.4213	14.062	14.8438	12.5519	987.756	1086.34	980.499	7.23376	7.8257	6.82852
42	64.3113	62.679	64.0937	49.9479	49.5833	48.0208	30.7812	29.4792	32.2917	16.0443	15.4097	14.78	1206.91	1147.42	1217.28	7.76177	7.19189	7.80198
43	71.6021	80.7428	73.3432	48.75	48.7346	48.5417	33.5417	28.8735	29.375	17.0167	19.1769	17.2818	1283.6	1104.6	1119.34	9.19083	8.91886	8.2096
44	43.6359	74.1049	102.289	47.7604	45	45	27.8646	28.3333	26.4583	9.9536	15.0062	20.7135	1044.7	1000.88	934.641	4.55863	7.41697	9.56032
45	71.9285	66.5965	71.8197	48.0208	49.1667	50	28.0903	28.9583	33.9583	16.5867	16.0988	17.9549	1058.9	1117.67	1332.86	7.61652	7.44329	9.5726
46	64.2025	50.9267	62.8967	48.75	50.0231	47.9398	25.4167	27.6157	28.8657	15.2581	12.7435	14.4551	972.664	1084.42	1086.3	6.24474	5.52259	6.83245
47	76.9341	82.1574	70.6227	48.0324	46.7188	47.9167	29.375	27.0833	28.8542	17.7496	17.932	16.215	1107.6	993.26	1085.34	8.52121	8.16037	7.66495
48	66.9229	55.0618	55.3338	47.8819	52.7604	50.6019	33.8889	29.4792	34.4444	15.3433	15.3273	14.1685	1273.79	1220.94	1368.22	8.52459	6.72269	7.57087
49	79.2193	83.3544	72.4726	48.3333	44.6296	47.7083	27.5	28.1481	29.1667	18.5065	16.6026	16.4954	1043.4	986.15	1092.32	8.26571	8.21999	7.91634
50	83.572	76.6077	76.0636	44.7685	45.5556	46.8403	26.0417	28.9815	29.4444	16.7497	15.8985	16.6884	915.19	1036.41	1082.66	7.64843	7.9397	8.23511
51	74.9754	62.4614	64.9642	49.6354	48.1019	49.2708	29.7917	26.9444	28.0208	18.4715	14.4522	15.7708	1160.8	1017.42	1083.78	8.70312	6.35495	7.04068
52	82.8103	68.8816	45.7035	48.8542	50.6771	51.25	27.6042	30.5208	28.125	19.7646	17.69	12.0043	1058.63	1214.16	1131.5	8.76658	8.36337	5.17136
53	73.1255	74.1049	76.0636	49.1146	47.6042	45.8681	29.2708	30.625	28.2639	17.6396	16.7933	16.0029	1128.54	1144.43	1017.68	8.25247	8.48081	7.74085
54	95.9773	90.754	51.6884	47.3843	49.5833	47.9861	27.8704	27.7083	28.3565	21.5495	22.3119	11.9021	1036.68	1078.49	1068.16	9.94981	9.78772	5.52117
55	69.6434	73.6696	65.6171	47.7315	49.1667	49.1667	34.2593	30.625	30.8333	15.8668	17.8086	15.862	1283.67	1182	1190.04	8.93989	8.70773	7.80869
56	73.2343	74.2137	85.2043	48.75	48.75	48.9062	27.4479	32.3438	28.2292	17.4046	17.6374	20.3793	1050.4	1237.75	1083.76	7.69252	9.18584	9.23408
57	76.7165	72.0373	69.2081	49.2708	48.1771	48.5417	32.0312	31.9792	31.6667	18.6238	16.7201	16.3075	1238.89	1209.42	1206.66	9.50435	8.71234	8.3511
58	94.4538	90.5364	74.4313	45.625	45.4167	44.838	28.3854	28.5938	28.8426	19.6619	18.6747	14.964	1016.64	1019.43	1015.2	9.60257	9.22952	7.55624
59	74.649	69.861	65.9436	49.2708	49.8958	50	27.6042	30	27.0833	18.1219	17.3926	16.4859	1067.66	1175.05	1063.02	7.96999	8.20899	7.00994
60	76.7165	76.0636	73.3432	46.9271	47.3958	48.125	30.7292	31.5625	29.3229	16.8941	17.0867	16.9864	1131.99	1174.31	1107.76	8.68426	8.93219	8.1247
61	68.1199	73.8872	68.2287	49.3056	48.4722	44.7917	31.8056	30.3819	31.1111	16.5602	17.3602	13.6887	1231.03	1156.05	1093.91	8.38576	8.54177	7.46362
62	95.2155	66.27	71.3844	49.1146	45.4167	45.2083	28.125	32.2917	31.4583	22.9683	13.6693	14.5895	1084.36	1151.27	1116.41	10.3248	7.62944	7.96943
63	77.2606	69.4257	67.467	48.75	49.537	47.7546	30.1562	33.6574	29.5602	18.3615	17.0365	15.3859	1154.04	1308.82	1108.13	8.9162	9.08659	7.47625
64	90.3187	86.7277	80.6339	44.0104	48.3333	42.7083	29.2188	29.1667	32.2917	17.494	20.2606	14.7076	1009.45	1106.63	1082.61	9.11727	9.59757	8.72953
65	76.8253	65.2906	56.694	48.9583	48.0208	46.5972	29.8958	29.9479	28.0093	18.4144	15.056	12.31	1148.97	1128.93	1024.55	8.82696	7.37084	5.80856
66	94.8891	75.3019	58.7616	46.6667	47.8009	47.2917	27.9167	29.5833	29.7917	20.6647	17.2059	13.142	1022.68	1110.08	1105.98	9.70412	8.35909	6.49894
67	90.2099	93.0392	70.8404	46.0938	44.2593	42.9167	27.7083	28.125	30.4167	19.1663	18.2253	13.0477	1002.59	977.161	1024.72	9.04433	9.09143	7.25919
68	104.683	77.2606	64.4201	45	42.1181	44.0972	29.6875	27.2222	25.3472	21.1982	13.7055	12.5269	1048.71	900.039	877.428	10.9782	6.95376	5.6524
69	93.5833	80.8516	66.8141	47.0833	44.375	46.25	30.5729	33.6458	38.9062	20.7459	15.9208	14.292	1129.99	1172.03	1412.54	10.5748	9.47606	9.43776
70	84.9867	88.9041	84.6602	46.5046	44.0509	44.5833	29.4676	26.9676	27.7083	18.3799	17.2517	16.8277	1075.75	932.539	969.734	9.14242	8.29065	8.20979
71	107.403	87.2718	83.4632	41.4583	44.6354	43.9815	28.8021	29.9479	29.0972	18.4604	17.3873	16.1449	937.358	1049.34	1004.6	10.0675	9.15777	8.38467
72	98.5889	88.6865	72.6903	39.7619	42.5	38.3681	27.5794	30.8854	30.8681	15.587	16.019	10.7008	860.837	1030.41	929.713	8.4869	9.13838	6.7581
73	86.0748	80.4163	77.6959	43.0556	44.8958	42.0833	30.1786	29.2708	31.4062	15.9564	16.209	13.76	1019.99	1031.6	1037.52	8.77958	8.29574	8.06109
74	95.9773	100.004	89.0129	42.8646	43.0208	40.2604	31.1458	30.6771	29.7396	17.6346	18.5086	14.4281	1048.02	1036.01	939.902	10.0586	10.3604	8.36635
75	95.3243	111.103	104.356	40.6481	39.1898	42.7083	27.9861	31.1806	27.3611	15.7502	17.0636	19.0346	893.003	959.239	917.31	8.51249	10.6574	9.5727
76	83.2456	75.3019	73.0167	42.1875	42.3958	41.8229	26.1458	30.625	26.3021	14.8159	13.5348	12.7718	865.876	1019.22	863.523	7.20804	7.67494	6.30516
77	104.247	87.8159	79.981	40.1562	44.5679	44.5312	28.6979	32.284	31.0938	16.8101	17.4429	15.8605	904.635	1129.48	1086.95	9.43058	9.91863	8.6935
78	94.2362	98.2624	68.0111	43.3333	42.2917	42.3958	30.9896	27.6042	30.7639	17.6955	17.5751	12.2244	1054.16	916.43	1023.84	9.93402	9.00506	6.96328
79	97.8272	93.7465	90.8628	42.6562	44.213	42.6042	30.0521	30.1852	31.5625	17.8002	18.3254	16.4926	1006.3	1047.64	1055.58	9.84433	9.82128	9.59134
80	81.0692	71.1668	71.8197	43.5417	47.5926	46.4583	31.3542	29.7685	28.9062	15.3697	16.1197	15.5014	1071.69	1112.16	1054.2	8.68812	7.91487	7.57127
81	75.4107	66.7053	67.0317	47.2917	47.0312	42.8935	28.0208	27.6562	25.7639	16.8656	14.7548	12.3329	1040.24	1021.06	867.507	7.84455	6.81098	5.81505
82	78.24	79.3281	80.3075	40.3241	44.7569	41.0417	29.5833	28.5417	25.9896	12.7221	15.8909	13.5271	936.443	1002.79	837.325	7.32672	7.95494	6.72435
83	76.7165	69.6434	71.4933	43.6905	45.625	43.5938	27.5595	29.4271	28.5938	14.6441	14.4972	13.5867	945.21	1053.95	978.509	7.25132	7.34006	6.99568
84	76.3901	80.9604	64.5289	46.7262	45.625	44.623	28.9881	31.3542	30.6349	16.6785	16.853	12.8491	1063.29	1122.97	1073.11	8.12244	9.0916	6.92468
85	93.5833	81.5045	74.3225	44.375	42.0313	42.3958	29.1667	31.5625	30.2083	18.4279	14.3988	13.3588	1016	1041.39	1005.36	9.50808	8.4878	7.47205
86	96.8478	99.0241	72.3294	42.2917	48.125	45.1997	33.125	31.6667	29.4175	17.3221	22.9341	14.777	1099.72	1196.31	1043.78	10.6505	11.8463	7.54963
87	80.4163	65.073	63.4407	48.1771	49.1146	48.9815	26.7708	28.125	32.0833	18.6649	15.6972	15.2206	1012.45	1084.36	1233.62	8.14172	7.05624	7.82617
88	83.2456	89.6658	66.8141	47.8241	43.125	44.2188	29.0972	27.5	27.1354	19.0394	16.6757	13.0641	1092.36	930.961	941.917	9.09345	8.34754	6.29333
89	86.2054	79.8931	72.3294	45.9945	45.961	45.1997	29.3558	29.7719	29.4175	18.2367	16.8767	14.777	1059.91	1074.15	1043.78	9.13702	8.58173	7.54963
90	86.2054	79.8931	72.3294	45.9945	45.961	45.1997	29.3558	29.7719	29.4175	18.2367	16.8767	14.777	1059.91	1074.15	1043.78	9.13702	8.58173	7.54963
91	100.548	84.9867	58.7616	48.3333	46.5104	43.9583	27.9167	27.9167	25.625	23.489	18.3845	11.3547	1059.2	1019.26	884.249	10.6501	8.66232	5.19599
92	96.5576	88.0336	86.1837	45.377	46.25	46.25	29.8214	30.625	29.8438	19.8819	18.8309	18.4352	1062.27	1111.88	1083.51	10.257	9.78827	9.33813
93	85.7484	98.6977	62.5702	45.2083	46.6667	48.3102	25	26.9271	27.4769	17.5252	21.4942	14.6031	887.214	986.429	1042.02	7.60771	9.73583	6.51993
94	91.4069	71.6021	63.1143	48.75	46.0417	44.7917	26.1111	32.3437	27.9167	21.7234	15.1785	12.6626	999.24	1168.99	981.591	9.13374	8.37022	6.19524
95	75.5195	68.1199	83.7897	45.6481	46.6667	44.375	28.8194	28.75	26.6667	15.7364	14.835	16.4994	1032.71	1053.21	928.917	7.79898	7.17445	7.78336
96	94.4538	91.7334	88.7953	44.7685	45.7812	43.5417	27.3611	27.8646	27.5	18.9306	19.2266	16.8345	961.559	1001.41	939.956	9.08229	9.18623	8.34636
97	84.3338	75.0842	84.6602	44.7917	46.3021	43.3333	24.6528	26.875	25.625	16.9198	16.0972	15.8973	866.828	976.829	871.677	7.31028	7.33445	7.37964
98	69.4257	73.7784	63.3319	47.3438	44.8438	44.7917	28.9062	29.1667	28.75	15.5613	14.8366	12.7062	1074.3	1026.74	1010.89	7.45838	7.57509	6.40217
99	84.0073	72.7991	55.8235	44.0741	46.5972	47.5347	25.625	30.0694	31.2153	16.3186	15.8069	12.6136	886.578	1099.9	1164.79	7.4479	8.0072	6.50227
100	80.9604	69.7522	83.3544	47.0833	45.8796	48.75	30.625	29.1898	31.4583	17.9476	14.6824	19.8097	1131.91	1051.29	1203.87	9.16401	7.33295	10.0348
101	78.0223	67.7935	43.5271	45.8333	45.6481	41.875	28.4375	26.7361	30.4167	16.3901	14.1265	7.63254	1023.16	958.056	999.853	7.98291	6.495	4.35207
102	87.7071	52.8854	65.2906	42.9167	42.5	47.5	25.2083	26.0417	26.875	16.1542	9.55243	14.7312	849.258	868.815	1002.1	7.4486	4.59477	6.54279
103	83.3544	76.2812	80.3075	46.5278	42.0833	41.0417	25.6481	27.3958	29.5833	18.0448	13.5095	13.5271	936.781	905.033	953.107	7.80848	6.9037	7.65417
104	80.3075	76.3901	80.1987	45.0992	45.8565	44.0625	26.8056	25.5324	25.5208	16.3341	16.0634	15.5706	948.994	919.099	882.742	7.62113	7.021	7.07947
105	77.6959	81.6133	77.1518	42.6562	42.4479	43.2292	27.4479	25.9896	26.3542	14.1372	14.7053	14.4178	919.098	866.015	894.326	7.14101	7.06783	6.89988
106	76.8253	69.5345	72.9079	46.0938	46.9271	44.5139	26.5104	26.5625	27.7778	16.3226	15.3126	14.4466	959.242	978.503	970.65	7.36941	6.80398	7.0768
107	85.5307	71.3844	50.4914	44.7917	45.5787	43.75	28.5417	28.125	27.8009	17.16	14.8295	9.66438	1003.57	1006.29	954.788	8.58358	7.18336	4.82086
108	87.7071	76.1724	79.2193	42.037	45	47.5	27.8704	28.4028	26.25	15.4988	15.4249	17.8739	919.696	1003.33	978.797	8.06639	7.64259	7.75396
109	83.6808	71.8197	73.2343	43.8194	42.9167	45.8333	27.7546	28.3333	26.9271	16.0679	13.228	15.3843	954.711	954.538	968.814	7.9891	6.85547	7.09505
110	79.0017	62.4614	67.6846	47.3148	47.7083	44.5833	28.3796	28.2292	26.9271	17.686	14.2167	13.4535	1054.08	1057.21	942.392	8.32741	6.60349	6.37854
111	92.2774	87.0542	89.557	43.5185	43.2292	43.8426	27.2685	29.2188	25.7639	17.4761	16.2683	17.2144	931.548	991.535	886.701	8.59609	8.63173	7.94103
112	73.2343	65.6171	55.0618	45.5903	48.8021	46.0417	30.9375	26.875	28.125	15.2216	15.6277	11.6722	1107.2	1029.57	1016.51	8.10853	6.75575	5.59711
113	78.6752	66.0524	56.5852	47.4769	47.3611	43.3333	27.9623	29.375	27.5	17.7338	14.816	10.6254	1042.14	1092.12	935.458	8.19903	7.2137	5.29331
114	83.572	79.2193	72.255	43.4954	46.5972	45.5324	30.162	25.6019	26.4815	15.8106	17.2009	14.9799	1029.85	936.486	946.526	8.60665	7.41877	6.83912
115	89.3394	75.6283	72.4726	46.713	46.6319	45.9028	27.5231	26.4236	27.7778	19.4948	16.4457	15.2705	1009.26	967.265	1000.94	9.01671	7.31526	7.25404
116	110.341	97.7183	75.3019	41.3194	42.8472	40.3819	26.9676	26.5509	27.3264	18.8385	17.94	12.2795	874.714	893.042	866.242	9.6517	8.72666	6.52296
117	77.6959	83.1368	80.5251	44.5833	43.9583	43.3333	26.4583	27.2917	26.6667	15.4434	16.0648	15.1208	925.987	941.762	907.111	7.19453	7.8295	7.30452
118	96.739	77.8047	73.2343	43.2292	42.2569	42.1528	26.6667	25.9722	27.4769	18.0782	13.8932	13.0127	904.931	861.543	909.207	8.75421	6.70321	6.65852
119	94.9979	96.0861	84.2249	42.8241	41.8287	38.3333	29.3056	29.5139	28.9583	17.4217	16.8116	12.3764	985.162	969.104	871.405	9.35883	9.31174	7.3394
120	84.2249	81.3957	77.2606	44.5602	44.838	40.8333	26.1806	26.6435	26.6667	16.7238	16.3641	12.8821	915.789	937.793	854.778	7.71323	7.63323	6.60406
121	89.7746	84.4426	84.8778	46.1458	47.5347	45.625	30.6597	27.8125	26.875	19.117	19.0802	17.6685	1110.63	1037.82	962.545	9.97066	8.76359	8.16987
122	97.5007	75.7372	75.7372	47.1875	46.4931	44.7454	27.7431	28.8542	26.9213	21.7101	16.3714	15.1637	1027.66	1053.09	945.614	10.0198	7.97582	7.16181
123	101.201	78.0223	80.7428	42.5926	42.1991	41.875	26.713	27.5694	28.125	18.3591	13.8939	14.1584	893.153	913.273	924.521	9.03875	7.12557	7.46484
124	92.7127	92.9304	85.3131	44.9653	44.838	41.0417	29.0625	26.088	28.9583	18.7454	18.6831	14.3703	1025.84	918.239	932.971	9.51085	8.53323	7.95947
125	92.7127	72.3638	75.4651	47.2917	43.125	47.0833	30.1562	31.1458	31.6898	20.7352	13.458	16.7294	1119.52	1054.38	1171.27	10.3794	7.62992	8.83899
126	94.1273	80.9604	81.178	43.2639	42.1354	41.9271	30.2778	27.0312	26.8229	17.6184	14.3737	14.2701	1028.3	894.094	882.816	9.6791	7.23862	7.16653
127	91.5157	78.6752	65.9436	42.6157	42.6736	46.0417	28.2407	29.1319	30.7812	16.6202	14.3271	13.9789	944.748	975.885	1112.52	8.64593	7.6778	7.33634
128	90.754	89.285	70.2419	47.2917	46.9676	46.1574	26.0417	29.4444	30.6713	20.2971	19.6959	14.9651	966.77	1085.6	1111.33	8.77382	9.69281	7.80619
129	82.375	83.4632	78.1311	46.4583	44.5312	43.9931	33.2812	32.0833	32.2569	17.7796	16.551	15.1214	1213.76	1121.54	1113.98	9.99835	9.36072	8.70365
130	62.8967	75.4107	60.9379	46.0185	47.5926	50.8333	38.4954	34.0278	33.5417	13.3197	17.0809	15.7465	1390.63	1271.28	1338.45	8.74658	9.58684	8.15625
131	80.3075	81.8309	70.2963	47.3148	44.3229	47.5	30.8333	30.625	31.9792	17.9784	16.0759	15.8606	1145.22	1065.55	1192.42	9.19694	8.7195	8.38229
132	75.9548	77.5871	83.8985	43.7103	44.1146	43.0324	31.8651	31.1979	31.9907	14.5119	15.0992	15.5362	1093.37	1080.38	1080.66	8.3047	8.38237	9.06658
133	98.8065	100.983	84.2249	45.2083	42.2396	44.5602	30.8565	33.0729	32.5463	20.194	18.0172	16.7238	1095.05	1096.63	1138.46	10.8198	11.0741	9.58868
134	86.0748	83.7897	81.3957	44.6875	46.875	45.2083	31.4062	30.4167	31.25	17.1889	18.4108	16.6356	1101.72	1119.24	1109.02	9.48305	9.37806	9.02692
135	93.8009	60.0674	82.0486	46.0417	43.125	42.2917	31.25	30.8333	32.0833	19.8842	11.1711	14.6751	1129.46	1043.8	1065.13	10.5944	6.26986	8.73927
136	87.4895	87.0542	79.6002	47.3148	46.3542	46.6667	30.3241	34.4792	30.8565	19.5862	18.7054	17.3352	1126.3	1254.63	1130.38	9.85394	10.9221	8.99781
137	75.0842	70.5139	55.2794	47.0833	47.6042	47.2917	32.0833	30.3125	30.4167	16.645	15.9796	12.3633	1185.81	1132.76	1129.19	8.90359	7.9875	6.24208
138	84.0617	72.6903	76.6077	50.8333	46.713	47.6042	31.4931	34.0972	33.9931	21.7218	15.8617	17.3605	1256.7	1250.33	1270.3	10.5641	9.08871	9.73144
139	98.9153	84.769	73.9417	41.2731	43.5417	45.9028	28.1019	30.3646	30.9259	16.85	16.0712	15.58	910.484	1037.87	1114.37	9.00608	8.7979	8.23987
140	84.6602	72.9079	73.0167	43.0556	47.6042	46.5104	30.1852	28.0208	30.9375	15.6941	16.5221	15.7951	1020.22	1047.12	1129.55	8.63718	7.63432	8.2476
141	63.7672	58.2175	70.5139	47.9167	48.7037	43.125	29.1667	28.125	28.125	14.641	13.8095	13.1139	1097.09	1075.29	952.119	6.99585	6.26005	6.71376
142	82.2662	74.8666	50.5458	48.0208	49.2708	47.1528	28.4375	30	31.4583	18.9706	18.1747	11.2383	1071.99	1160.33	1164.43	8.81886	8.68698	5.8857
143	86.9454	74.5402	58.7616	46.2963	46.7708	47.0833	27.2222	28.9583	30.2083	18.6354	16.3057	13.0265	989.326	1063.21	1116.51	8.60173	7.92517	6.5608
144	82.4839	63.2231	63.3319	49.7917	46.7188	46.875	32.7083	28.5938	29.1667	20.4495	13.7993	13.9157	1278.45	1048.65	1073.24	10.5452	6.62991	6.79705
145	76.2812	80.0899	65.5083	49.3056	45.8333	47.6852	28.2407	30.2083	26.9213	18.5443	16.8244	14.8958	1093.05	1086.87	1007.74	8.33795	8.70473	6.60154
146	88.7953	73.5608	64.6377	44.2708	47.4479	44.9653	32.6042	32.5	24.8264	17.403	16.5608	13.069	1133.08	1210.51	876.315	10.0612	8.90464	5.66431
147	82.0486	70.9492	70.7315	48.0208	45.8333	50.625	28.7847	28.5417	31.0417	18.9204	14.9043	18.1277	1085.08	1026.91	1233.62	8.90292	7.28581	8.72555
148	87.5983	77.1518	52.559	47.3611	46.4815	44.8611	28.125	31.6667	33.8542	19.649	16.6689	10.5776	1045.64	1155.45	1192.21	9.15967	8.91452	6.26612
149	90.2643	68.7728	76.3901	44.4097	45.0521	43.125	25.9722	29.7801	30.8333	17.8021	13.9588	14.2068	905.434	1053.2	1043.8	8.17284	7.24315	7.97363
150	84.0073	68.4464	67.0317	45.4167	47.7083	48.125	26.875	30.5729	26.4583	17.328	15.579	15.5247	958.15	1144.99	999.546	8.04916	7.83702	6.70013

## Sheet: 2019
No. of lines	SDt	SDm	SDb	SLt	SLm	SLb	SWt	SWm	SWb	PCIt	PCIm	PCIb	SAt	SRAt	SAm	SRAm	SAb	SRAb
1	81.178	90.5364	65.2906	45.5208	45.2083	47.4306	26.7708	27.7083	28.2639	16.8213	18.5038	14.6882	1258	7.76569	983.328	8.9027	1052.35	6.87085
2	75.5195	64.7466	59.5233	45.9028	47.1875	48.2292	26.5972	25.7986	28.3681	15.9125	14.4169	13.8454	1153.69	7.23776	955.637	6.18742	1074.01	6.39287
3	71.4933	78.3488	71.4933	47.2222	49.5139	43.75	27.1181	27.2222	33.3333	15.9426	19.2082	13.6843	1150.38	7.18687	1058.08	8.28996	1144.79	8.18449
4	95.2155	69.2081	59.8498	47.4306	47.7431	42.9167	26.9097	26.3542	25	21.4202	15.7753	11.0234	1133.34	9.53992	987.709	6.83575	842.24	5.04078
5	82.9191	80.7428	57.7822	46.3889	48.2986	48.4722	27.4653	25.6944	28.9583	17.8436	18.8353	13.5763	1127.83	8.2932	974.19	7.86588	1101.88	6.36693
6	72.0373	66.0524	68.5552	48.6111	46.9444	47.0833	27.6042	28.4375	26.4583	17.0227	14.5565	15.1976	1094.44	7.58818	1047.96	6.92203	977.911	6.70409
7	88.0336	86.8366	76.2812	45.1042	44.1667	43.5417	27.5694	28.1597	28.4028	17.9094	16.9392	14.462	1090.29	8.59335	976.321	8.47804	970.813	7.40548
8	74.3225	73.6696	72.1462	44.8611	47.3264	43.5417	28.2639	28.4722	27.5694	14.9576	16.5004	13.678	1090.15	7.39762	1057.78	7.79261	942.329	6.79854
9	77.4782	74.1049	64.3113	44.5833	45.3472	44.8264	25.7986	25.7986	28.0556	15.4001	15.2387	12.9227	1088.91	6.99549	918.368	6.80555	987.239	6.34906
10	79.2193	73.6696	61.3732	47.1875	46.0417	45.9028	26.875	27.0833	26.0417	17.6395	15.6167	12.9317	1085.25	7.88635	978.865	7.21126	938.377	5.75912
11	73.6696	72.9079	68.664	49.7222	50.9722	47.9861	27.7431	27.2569	27.1875	18.2133	18.9427	15.811	1082.92	7.97743	1090.64	7.95161	1024.13	7.03208
12	82.7015	69.7522	64.4745	46.25	41.5625	41.8403	26.2153	25.7986	25.4167	17.6904	12.0493	11.287	1082.87	7.87135	841.72	5.87118	834.801	5.38234
13	77.4782	78.0223	68.5552	40.625	47.2917	39.9479	26.0417	27.8472	27.3264	12.7869	17.4497	10.9403	1081.08	6.43445	1033.8	8.06594	856.931	5.87471
14	82.0486	80.1987	40.589	44.6181	48.75	45.8333	27.6042	28.5764	26.875	16.334	19.0597	8.52651	1080.91	7.93279	1093.58	8.77039	966.94	3.92472
15	68.3375	67.2494	58.4895	48.3333	49.3056	49.3056	28.5417	29.0972	30	15.9644	16.3486	14.219	1080.31	7.4004	1126.2	7.57365	1161.15	6.79149
16	89.7746	74.8666	73.9961	42.6389	43.8889	41.3889	26.2847	28.9236	27.6389	16.3217	14.4211	12.6758	1076.56	7.89828	996.499	7.46045	897.995	6.64481
17	77.2606	77.1518	78.1311	46.5625	47.0486	44.8611	25.1042	28.125	26.2847	16.7506	17.0781	15.724	1072.3	7.08941	1038.75	8.0141	925.642	7.23215
18	76.2812	77.5871	70.4051	43.5069	46.9792	41.875	27.1181	27.1528	26.3194	14.4389	17.1238	12.3456	1071.27	7.06488	1001.36	7.76924	865.169	6.09123
19	78.8929	70.4051	84.769	45.2778	47.9514	42.2222	26.9444	27.6736	26.25	16.1736	16.1885	15.1119	1069.91	7.55547	1041.69	7.334	870.042	7.37526
20	83.1368	69.4257	58.7616	45.2778	46.1111	38.125	26.4931	29.4097	34.375	17.0437	14.7615	8.54109	1064.82	7.82852	1064.55	7.39072	1028.78	6.04527
21	95.8684	78.784	67.9023	47.3958	46.4236	42.7083	26.8403	26.8056	26.9444	21.5355	16.9792	12.3854	1058.36	9.57354	976.862	7.69612	903.341	6.13389
22	79.437	68.9905	66.3788	44.4792	45.5556	42.5694	26.6667	25.6944	25.9028	15.7158	14.3176	12.0289	1056.14	7.39635	918.862	6.33927	865.593	5.74571
23	87.9247	79.7634	76.6077	43.6806	45.2083	44.0972	27.3958	25.8681	25.1042	16.776	16.302	14.8969	1054.64	8.25949	918.02	7.32244	869.014	6.65731
24	75.5195	67.9023	53.756	46.1111	47.5	44.5833	26.7361	25.625	26.3889	16.0572	15.3205	10.6849	1053.37	7.30857	955.492	6.48801	923.556	4.96467
25	81.2869	76.9341	72.5814	48.3681	44.8958	41.7014	28.7153	30.2431	26.5278	19.0168	15.5071	12.622	1052.24	8.86261	1065.86	8.20013	868.402	6.30299
26	71.6021	69.9698	74.3225	45.625	44.4097	44.7917	28.125	27.6736	28.9236	14.905	13.7996	14.9113	1051.99	7.21258	964.747	6.75032	1017	7.55857
27	84.8778	83.2456	74.4313	48.125	43.9583	41.25	27.9167	25.9375	29.5833	19.6578	16.0858	12.665	1047.48	8.95155	895.033	7.45075	957.945	7.13012
28	68.7728	69.861	72.9079	47.2917	48.5069	47.5	27.2917	29.6528	30.4167	15.3811	16.4378	16.4498	1045.8	6.96789	1129.12	7.88812	1134.16	8.26893
29	65.5083	58.3263	67.5758	46.1806	48.9931	47.9861	31.1111	32.9861	29.8264	13.9706	14.0002	15.5605	1043.35	7.38823	1268.63	7.39946	1123.53	7.59237
30	72.255	65.5083	66.3244	45.625	47.1528	47.6042	28.8194	30.3472	27.4306	15.0409	14.565	15.0302	1043.24	7.45806	1123.3	7.35855	1025.06	6.79865
31	70.0786	63.1143	73.3432	47.2222	48.8889	48.125	29.375	27.2917	28.2292	15.6271	15.0851	16.9864	1041.28	7.63097	1047.39	6.61055	1066.44	7.82164
32	86.0748	86.9454	85.0955	45.625	45.4514	44.9653	27.8472	28.9583	28.5069	17.9177	17.9614	17.2053	1040.87	8.58481	1033.21	8.98332	1006.23	8.56257
33	77.3694	56.9661	39.1744	49.2014	49.3056	45	27.5694	28.0903	28.75	18.7294	13.8487	7.93281	1038.12	8.23843	1087.23	6.19353	1015.59	3.97853
34	73.452	63.9848	54.6265	48.0556	48.6806	45.2083	28.0556	26.6667	28.75	16.9625	15.1631	11.1645	1034.86	7.77384	1019.05	6.52035	1020.3	5.57352
35	77.9135	63.9848	65.1818	46.5278	50.5556	44.1667	27.6389	32.9167	29.7222	16.867	16.3537	12.715	1032.19	7.8653	1306.33	8.35856	1030.49	6.71695
36	27.7501	25.9197	24.0854	45.6568	46.1243	44.9245	27.827	27.8882	27.5749	5.78463	5.51429	4.86094	1030.22	2.76762	1009.76	2.61728	972.45	2.34218
37	82.7015	59.7409	50.8723	43.4028	47.2569	46.6667	29.5139	26.875	26.6667	15.5793	13.3415	11.0789	1029.16	8.31624	996.974	5.95602	976.889	4.96966
38	90.2099	67.9023	63.8216	42.1528	44.0278	44.8611	28.5417	28.0556	28.1944	16.029	13.1625	12.8442	1029.12	8.5198	969.651	6.58415	992.895	6.33681
39	85.5307	87.2718	82.0486	43.3333	42.2917	41.7014	27.2222	26.3194	26.5972	16.0608	15.6093	14.2683	1029.06	7.92023	873.778	7.62562	870.676	7.14377
40	74.1049	74.3225	71.1668	44.1319	44.4444	40.4167	29.375	27.1181	33.9583	14.4329	14.681	11.6251	1029.02	7.54132	946.119	7.03179	1077.4	7.6675
41	85.966	87.4895	75.5195	41.875	42.1528	42.2917	28.6806	29.375	29.7917	15.0743	15.5456	13.5073	1028.47	8.10474	972.017	8.50412	989.052	7.46928
42	59.4145	69.5345	50.0562	45.8333	44.7569	44.7917	28.5417	28.3681	26.6667	12.4812	13.929	10.0427	1027.69	6.10131	996.689	6.93043	937.639	4.69346
43	73.0167	77.9135	74.4313	46.4583	47.2222	43.9583	27.4306	27.9861	27.0486	15.7598	17.3742	14.3826	1027.13	7.30449	1037.43	8.08298	933.374	6.94723
44	81.2869	68.9905	81.9398	44.3056	43.8889	41.5278	27.8125	29.5833	29.9306	15.9565	13.2892	14.131	1026.91	7.863	1019.23	7.0317	975.715	7.99499
45	72.1462	71.058	74.1049	47.5	45.7639	45.4861	27.3264	27.5694	27.8125	16.278	14.8819	15.3322	1024.62	7.35121	990.423	7.03774	993.09	7.35928
46	80.3075	71.3844	60.8835	45.3125	46.875	41.9444	25.5208	28.9236	25	16.4889	15.6851	10.7115	1018.93	7.29019	1064.3	7.59744	823.16	5.01169
47	80.1987	70.1874	78.5664	44.9306	45.4514	45.1389	28.0556	25.7639	26.25	16.1901	14.4995	16.0081	1017.77	7.93592	919.239	6.4519	930.143	7.3078
48	68.0111	58.9792	67.3582	48.6111	50	48.75	28.6806	28.8889	29.1667	16.0713	14.7448	16.0081	1017.66	7.44342	1133.89	6.68759	1116.17	7.51833
49	74.3225	75.5195	81.0692	45.7639	47.8819	46.3194	28.0556	27.9514	27.6389	15.5656	17.3142	17.3933	1014.76	7.49086	1050.62	7.93422	1004.97	8.14722
50	75.846	81.5045	88.6865	44.375	45.2083	42.8472	27.1528	27.5	27.2917	14.9351	16.6578	16.2818	1013.17	7.17389	975.935	7.95431	917.957	8.14104
51	80.1167	73.8805	69.6078	45.6568	46.1243	44.9245	27.827	27.8882	27.5749	16.7007	15.7177	14.0483	1009.96	7.99033	1009.76	7.46019	972.45	6.76901
52	89.9923	68.8816	54.4089	49.7917	50.0347	49.375	27.6389	29.6528	27.5	22.311	17.2443	13.2643	1009.49	9.72192	1164.68	8.0225	1065.88	5.79935
53	76.3901	69.3169	75.4107	46.875	46.1806	43.6806	27.2222	28.3333	26.5972	16.7849	14.7828	14.3883	1008.98	7.65194	1027.13	7.11976	911.998	6.87744
54	80.1167	73.8805	69.6078	45.6568	46.1243	44.9245	27.827	27.8882	27.5749	16.7007	15.7177	14.0483	1007.89	7.99033	1009.76	7.46019	972.45	6.76901
55	78.4576	69.9698	74.8666	46.4583	45.5903	45.625	27.1875	29.1667	29.3403	16.9341	14.543	15.5845	1007.31	7.77925	1043.83	7.30364	1050.84	7.86729
56	69.861	74.649	76.1724	48.5417	44.7917	45.8333	27.3264	30.8681	29.6528	16.4613	14.9768	16.0015	1005.57	7.27447	1085.37	8.10214	1066.88	8.1267
57	76.4989	69.9698	60.285	47.9861	47.7778	44.2361	28.4028	27.7083	32.5694	17.6151	15.9721	11.7968	1005.44	8.18467	1039.22	7.27138	1130.99	6.81815
58	75.0842	80.7428	64.5289	47.2222	45.9028	46.1806	27.9167	29.375	27.5	16.7433	17.013	13.7617	1005.25	7.77013	1058.49	8.54654	996.923	6.43304
59	68.4464	71.4933	63.876	49.8611	46.4583	49.4792	27.3958	28.125	28.9236	17.0167	15.4309	15.638	1005.23	7.3395	1025.71	7.33316	1123.43	7.176
60	85.2043	70.4051	76.9341	45.1389	47.2222	44.0278	29.375	29.0278	27.2569	17.3605	15.6999	14.9133	1004.34	8.8687	1076.04	7.57589	942.049	7.24758
61	68.3375	59.1969	65.1818	49.6528	49.6528	46.25	29.5139	28.5069	26.25	16.8479	14.5944	13.9428	1002.3	7.86138	1111.13	6.57752	953.039	6.21208
62	73.1255	69.9698	57.891	47.1181	47.2917	48.125	26.8403	26.3542	30.2083	16.2347	15.6488	13.4077	1001.93	7.25961	978.371	6.84564	1141.21	6.60661
63	84.1161	73.2343	59.8498	43.6806	45.4861	46.6319	26.6667	28.9931	26.6319	16.0493	15.1521	13.0146	1001.69	7.69141	1035.24	7.58154	974.891	5.8347
64	82.0486	79.8722	79.3281	44.9653	43.125	42.1875	26.2153	26.25	24.7917	16.5892	14.8544	14.1187	1000.39	7.59228	888.645	7.0978	821.03	6.51308
65	72.5814	63.5496	83.1368	47.7778	48.4722	46.5972	33.5417	27.3264	31.0417	16.5683	14.9313	18.0515	1000.16	9.13074	1039.79	6.60781	1135.47	9.43991
66	84.4426	77.8047	70.6227	44.7222	48.6806	47.0486	27.5694	27.7778	27.7431	16.8892	18.4381	15.6328	998.612	8.17302	1061.51	8.25902	1024.64	7.23628
67	65.2906	55.7147	61.9173	48.8194	47.9861	48.6111	27.2222	25.8333	29.0278	15.561	12.8292	14.6313	997.937	6.81141	973.118	5.4217	1107.69	6.85853
68	83.572	72.255	67.3582	44.3056	46.3542	44.2014	25.9375	25	27.1528	16.405	15.5255	13.1602	997.366	7.53905	909.701	6.57304	942.15	6.34615
69	74.9754	77.1518	78.4576	47.5694	44.6875	46.0764	29.0625	26.5625	29.2361	16.9658	15.407	16.6568	997.336	8.13673	931.804	7.18904	1057.47	8.29665
70	79.6546	68.4464	74.649	46.2153	45.7292	44.5833	28.3681	27.1528	26.0069	17.013	14.3132	14.8378	997.336	8.19777	974.714	6.67156	910.189	6.79447
71	80.9604	79.5458	73.5608	42.9167	43.2639	46.9444	27.0833	30.5556	27.1875	14.9116	14.8891	16.2112	997.336	7.38704	1037.73	8.25472	1001.9	7.37004
72	72.5814	74.2137	81.8309	41.9444	43.6458	41.7708	27.3611	27.1181	26.4236	12.7695	14.1374	14.2779	997.336	6.53888	929.118	6.89533	866.433	7.0901
73	81.8309	82.9191	88.36	45.7292	47.1181	41.3194	29.3056	29.7569	27.9167	17.1121	18.409	15.0857	995.509	8.60856	1100.64	9.12641	905.498	8.00098
74	78.0223	85.966	85.6396	46.2153	44.1667	41.5972	27.7083	26.4583	28.4028	16.6644	16.7693	14.8185	995.34	7.84304	917.332	7.88594	927.459	7.94272
75	105.771	86.2925	104.9	43.2292	41.3889	42.9514	26.6667	29.0972	27.0833	19.766	14.7822	19.3522	994.436	9.57153	945.377	8.15789	913.164	9.57912
76	80.1987	74.649	71.8197	43.6111	46.1806	43.0903	26.5972	25.2431	25.2778	15.2532	15.92	13.3353	994.379	7.30248	915.105	6.83116	855.043	6.14089
77	83.572	87.3806	73.3432	42.9861	42.0833	47.7431	27.9861	28.8194	30.4861	15.4425	15.4752	16.7178	993.311	7.89226	952.062	8.31918	1142.57	8.37995
78	83.7897	70.5139	73.9961	47.9167	42.0833	48.5417	26.0417	27.0833	25.625	19.2382	12.4881	17.4356	992.759	8.20759	894.709	6.30894	976.446	7.22532
79	79.7634	84.2793	77.6415	44.6875	43.3333	43.8889	31.0764	28.6111	28.9931	15.9285	15.8258	14.9556	992.423	8.69541	973.255	8.20253	998.891	7.75554
80	74.8666	76.1724	72.6903	46.1806	48.9583	46.6667	28.3333	26.875	26.0417	15.9664	18.2579	15.8303	991.522	7.68979	1032.87	7.8676	953.993	6.9346
81	81.5045	69.3169	61.0468	44.9306	45.5556	45	26.1111	27.9167	25.0694	16.4538	14.3854	12.362	989.533	7.50617	998.331	6.92012	885.578	5.40617
82	78.6752	75.4651	66.3788	45.4514	46.0417	41.4931	27.5347	26.7708	26.1806	16.253	15.9974	11.4283	985.21	7.72922	967.57	7.30178	852.754	5.66048
83	82.8103	71.1668	73.1255	43.6806	45.1042	44.7917	27.6736	30	26.2153	15.8001	14.4781	14.6711	983.499	7.85793	1062.2	7.55936	921.767	6.74047
84	73.6696	58.9792	69.6434	48.3333	49.5139	46.7708	27.1528	30.1389	27.2917	17.21	14.4595	15.2346	983.249	7.5896	1171.45	6.90912	1002.02	6.97838
85	97.0654	71.9285	89.9923	43.125	43.0208	44.375	29.375	26.1806	26.4583	18.0519	13.3125	17.7207	982.528	9.65253	884.153	6.35958	921.66	8.29422
86	85.5307	89.8835	97.936	45	47.0833	48.75	32.0833	30.8333	31.4583	17.32	19.9257	23.2751	982.421	9.69357	1139.61	10.2432	1203.87	11.7902
87	71.6021	60.5027	54.4089	48.1944	47.5694	46.875	26.4931	29.6875	27.0139	16.631	13.6909	11.9551	979.546	7.17669	1108.59	6.70727	994.027	5.40839
88	87.4895	72.7991	60.5027	46.0417	46.6319	47.6736	28.4722	26.0764	25.8333	18.5463	15.8304	13.7509	976.145	9.00322	954.554	6.94907	966.781	5.84928
89	64.8554	66.9773	62.4614	48.9583	48.1944	46.9167	28.125	28.9583	26.5	15.5453	15.5569	13.7488	974.103	7.01027	1095.57	7.33784	975.984	6.09613
90	78.5664	74.4313	68.0111	45.5903	49.375	48.3333	27.1181	28.125	26.9792	16.3298	18.1455	15.8881	973.989	7.62496	1090.11	8.11382	1023.63	6.96185
91	83.572	70.7315	63.4407	45.7986	47.6389	46.8403	27.6042	29.7222	27.1875	17.5293	16.0523	13.919	973.737	8.29388	1111.51	7.86187	999.674	6.34201
92	84.1161	82.9191	77.043	46.875	46.3194	46.3194	26.7014	26.7361	26.7361	18.4825	17.7902	16.5295	971.989	8.26464	972.145	8.06094	972.145	7.4897
93	79.8722	81.6133	72.8535	48.5764	46.3194	44.9306	27.3611	29.4097	28.75	18.8472	17.5101	14.7073	971.071	8.33344	1069.36	8.7274	1014.03	7.38754
94	81.2869	73.1255	68.7728	48.6111	46.7361	44.4792	26.3194	32.7083	29.5833	19.2084	15.9725	13.606	970.511	8.16399	1200	8.77505	1032.94	7.10379
95	74.5402	77.2606	95.8684	46.1111	45.4167	41.1111	27.5694	29.8264	27.6389	15.849	15.9363	16.2029	969.514	7.43864	1063.37	8.21568	891.968	8.55116
96	91.951	74.3225	71.9285	46.7708	46.6667	41.7361	27.6389	28.125	25.2778	20.1144	16.1858	12.5293	967.879	9.33086	1030.31	7.65754	828.172	5.95692
97	78.3488	64.6377	69.3169	42.1181	44.3403	42.7083	27.5	27.4306	27.0486	13.8985	12.7082	12.6434	967.773	7.12366	954.779	6.17147	906.833	6.28588
98	64.2025	66.1612	66.1612	46.0417	48.1944	44.0972	28.1597	29.3056	26.7361	13.6099	15.3673	12.8655	967.315	6.53433	1108.71	7.33533	925.506	6.12326
99	76.3901	74.1049	52.2325	46.5278	47.9167	44.375	26.2153	29.1667	30	16.5372	17.0145	10.2853	967.213	7.31431	1097.09	8.12999	1045.03	5.45846
100	69.861	63.2231	64.6377	48.8194	49.6528	45.4167	30.1042	29.2014	27.7083	16.6502	15.587	13.3327	966.841	8.05979	1138.2	7.19602	987.86	6.3853
101	72.6903	71.6021	59.6321	47.2917	46.7708	43.9583	27.0833	27.5694	25.6944	16.2572	15.663	11.5229	960.694	7.30857	1012.22	7.24767	886.646	5.28726
102	73.9961	72.9079	62.0261	48.75	49.3403	45.2083	26.875	26.0764	25.3472	17.5856	17.7492	12.6769	958.396	7.61029	1009.99	7.36365	899.536	5.57947
103	74.5402	62.0261	53.3207	47.1875	48.2292	47.5694	26.2153	27.5	26.7361	16.5976	14.4276	12.0657	957.688	7.23838	1041.15	6.45783	998.38	5.32343
104	66.0524	71.4933	81.3957	47.1875	43.6458	42.0833	26.1111	25.6597	26.7361	14.7076	13.6192	14.4152	957.495	6.38867	879.153	6.28535	883.239	7.18918
105	75.7372	74.8666	81.8309	42.5347	40.4861	40.8681	26.1458	26.7708	24.4444	13.7024	12.2716	13.6674	957.059	6.61188	850.82	6.3698	784.213	6.41729
106	73.1255	76.8253	73.2343	46.6667	44.8611	40.2083	26.8403	28.6111	26.2153	15.9251	15.4612	11.8399	956.625	7.19006	1007.57	7.74067	827.447	6.05975
107	86.4557	75.4107	58.7616	45	48.3333	40.625	29.6528	28.6458	26.25	17.5073	17.6168	9.69796	953.985	9.0561	1086.87	8.19617	837.129	4.9191
108	69.0993	57.0205	63.1143	49.4792	47.0833	46.2153	26.4931	27.6042	25.3125	16.9168	12.6405	13.4803	951.778	7.11046	1020.26	5.81758	918.312	5.79586
109	84.769	66.9229	65.2906	43.3333	44.2361	43.125	27.3958	26.5972	30.625	15.9177	13.0957	12.1425	949.905	7.89975	923.598	6.18099	1036.75	6.76902
110	71.8197	74.2137	66.8141	46.6667	47.4653	41.9792	27.5694	26.3542	26.2153	15.6407	16.72	11.7743	948.907	7.25351	981.963	7.28751	863.889	5.772
111	83.6808	74.8666	73.1799	47.7778	47.5694	43.1597	28.0556	29.3403	26.5972	19.102	16.9412	13.6317	945.85	8.80523	1095.63	8.20257	901.124	6.59442
112	92.1686	65.8347	56.15	46.0417	47.0139	44.375	27.9167	26.8056	28.125	19.5382	14.5515	11.0567	944.442	9.29967	989.283	6.51292	979.717	5.50111
113	79.1105	84.2249	52.2325	47.0833	46.1806	43.9583	26.875	27.0833	28.5417	17.5375	17.9622	10.0931	944.366	7.85813	981.818	8.26935	984.896	5.14436
114	66.4876	67.3582	77.6959	47.8472	47.1181	47.0833	27.6389	27.2569	26.0417	15.2214	14.9543	17.2239	942.784	6.90221	1008.17	6.79086	962.511	7.47831
115	94.5626	92.7127	54.1912	45.2778	46.25	45.4167	26.8403	27.0833	26.875	19.3861	19.8318	11.1779	941.644	9.02114	983.294	9.11639	958.15	5.19233
116	82.2662	88.0336	83.3	42.5347	44.375	43.2292	28.1944	28.5764	25.9375	14.8836	17.335	15.5668	941.406	7.74459	995.441	8.76322	880.186	7.33195
117	80.8516	83.1368	68.1199	44.7917	46.4236	47.6736	26.2153	27.4306	27.2917	16.2212	17.9172	15.4821	939.382	7.45264	999.639	8.31067	1021.36	6.95748
118	91.951	93.3656	74.7578	41.8056	44.8611	43.8542	26.0417	29.4792	27.9167	16.0703	18.79	14.3773	939.087	7.8583	1038.14	9.69264	961.046	7.18457
119	84.8778	79.6546	73.452	44.1667	45.625	42.3264	27.6042	26.9097	27.8819	16.5571	16.5812	13.1591	936.908	8.12331	963.789	7.67702	926.411	6.80468
120	87.7071	79.8722	76.1724	45.7639	45.8333	42.4306	25.5556	27.0833	25.8333	18.3688	16.7787	13.7137	931.915	8.05217	974.436	7.78304	860.456	6.5543
121	84.5514	78.5664	86.5101	46.1806	44.0625	45.7292	28.2639	29.8611	29.9653	18.0318	15.2537	18.0906	931.251	8.66326	1032.87	8.11487	1075.68	9.30568
122	74.1049	84.8778	83.1368	44.5139	43.75	43.5417	28.1944	26.6667	31.0417	14.6838	16.2461	15.7617	931.097	7.30089	915.833	7.7734	1061.01	8.8209
123	73.0167	62.1349	68.5552	43.5069	43.75	41.6667	27.2222	26.1458	28.125	13.821	11.893	11.9019	929.719	6.7885	897.946	5.57938	919.922	6.30654
124	74.1049	68.664	58.7616	45.9375	46.8056	45.4167	26.0417	25	25	15.638	15.0426	12.1206	929.507	6.95909	918.559	6.30719	891.302	5.23743
125	70.6227	64.5289	62.679	47.5	46.4236	42.7083	28.9931	28.1944	25.8333	15.9343	13.907	11.4327	928.849	7.63487	1027.48	6.6302	866.089	5.42856
126	87.0542	81.0692	78.3488	45.1389	45.6597	44.4792	27.3611	26.6667	28.9931	17.7375	16.9014	15.5005	926.162	8.44003	955.81	7.74868	1012.33	7.93145
127	72.0373	78.4576	74.649	45.625	40.1111	44.6875	27.1875	26	24.7569	14.9956	12.6231	14.9072	926.009	7.01455	818.668	6.42307	868.466	6.48301
128	74.5402	63.1143	73.8872	47.7778	49.2014	44.5139	25.9722	28.1597	25	17.0154	15.2786	14.6407	925.34	7.26098	1087.62	6.86441	873.585	6.45468
129	97.2831	73.3432	64.2025	45.6597	50.4167	50	27.1181	31.1111	27.5	20.2817	18.6427	16.0506	921.767	9.45581	1231.29	9.03065	1079.38	6.92985
130	84.3338	80.7428	63.7672	43.2986	46.9792	48.2639	30.2778	28.9583	28.8194	15.8106	17.8203	14.854	920.952	8.67899	1067.94	8.62288	1091.89	6.96266
131	87.163	68.2287	73.5608	43.0208	46.1806	44.8611	29.4444	24.8611	28.8889	16.1321	14.5508	14.8043	918.074	8.6673	901.258	6.14917	1017.35	7.48371
132	82.9191	84.0073	78.5664	44.0278	43.6111	42.8819	26.875	25.6944	26.875	16.0734	15.9776	14.4473	917.597	7.70193	879.642	7.38964	904.675	7.10771
133	76.7709	82.7015	79.2193	40.8333	46.6667	42.0833	26.875	27.9167	30.625	12.8005	18.0105	14.0298	914.38	6.61347	1022.68	8.45772	1011.71	8.01469
134	77.6959	93.3656	80.7428	42.7083	45	44.5833	28.3333	26.6667	23.8194	14.1717	18.9065	16.049	912.835	7.38037	942	8.79504	833.631	6.73097
135	85.4219	69.3169	71.3844	45.3125	44.9306	43.5417	26.1806	26.5625	26.25	17.539	13.9934	13.5336	912.426	7.95492	936.872	6.49411	897.23	6.40483
136	80.1167	73.8805	69.6078	45.6568	46.1243	44.9245	27.827	27.8882	27.5749	16.7007	15.7177	14.0483	910.549	7.99033	1009.76	7.46019	972.45	6.76901
137	63.3319	51.1443	51.9061	46.9097	47.3264	47.2917	28.6806	27.5347	27.9167	13.9363	11.4552	11.6088	909.224	6.68872	1022.95	5.2318	1036.38	5.37943
138	81.5045	83.3544	61.5908	48.4028	47.9861	46.7014	28.3333	28.8542	28.5069	19.0951	19.1937	13.4331	907.784	8.77443	1086.91	9.05988	1045.08	6.43674
139	82.8103	66.3788	68.8816	43.4375	42.3264	42.2569	30.1389	29.3403	29.5139	15.6248	11.8919	12.2998	904.931	8.51032	974.866	6.47105	979.026	6.74369
140	76.9341	73.2343	68.7728	42.0486	47.9167	46.7014	26.5625	27.5347	26.8403	13.6026	16.8147	14.9995	903.886	6.74543	1035.71	7.58493	983.98	6.76711
141	75.6283	69.861	47.4445	45.8333	47.4306	49.7917	26.7014	28.0903	24.7917	15.8872	15.7163	11.7625	902.898	7.26557	1045.88	7.30666	969.018	4.59746
142	87.7071	77.5871	53.3207	42.8472	45.9028	45.2083	26.2153	26.8403	27.9167	16.102	16.3481	10.8976	902.103	7.7336	967.154	7.50386	990.722	5.2826
143	87.2718	82.4839	58.7616	43.8889	40.625	42.2917	26.9792	27.3958	25.8333	16.8106	13.6131	10.51	900.903	8.11198	873.67	7.20637	857.64	5.03963
144	98.0448	90.4275	66.8141	42.5	44.1667	43.8889	27.3611	28.4722	27.5694	17.7093	17.6397	12.87	881.753	8.94987	987.156	8.92661	949.844	6.3463
145	86.4013	72.9079	71.1668	45.3472	44.0972	42.6389	26.3194	24.7222	24.9306	17.7673	14.1774	12.9387	879.79	8.09501	855.792	6.2394	834.464	5.93861
146	74.2137	78.0223	62.7878	44.4097	47.6042	44.2708	30.7292	29.6528	31.6667	14.6366	17.6811	12.3058	876.779	7.95028	1108.1	8.64567	1100.5	6.9098
147	83.572	74.1049	69.5345	45.1389	42.9861	44.9653	29.5139	24.8264	28.4028	17.028	13.6931	14.059	873.003	8.73993	837.744	6.20809	1002.55	6.97121
148	72.4726	73.7784	69.2081	45.3472	43.3681	44.5833	27.3611	28.9931	26.0417	14.9031	13.8762	13.7563	861.456	7.05875	987.037	7.28221	911.404	6.30765
149	100.548	80.4163	74.2681	41.0417	41.1458	39.8611	28.0556	28.5417	27.3611	16.9364	13.6143	11.8005	854.619	9.08835	921.881	7.41343	856.156	6.35851
150	83.572	81.7221	76.4989	42.5	42.1528	44.9653	29.4792	26.7361	27.0833	15.0952	14.5209	15.4671	830.485	8.2193	884.696	7.22992	955.981	7.31314
